# Supplementary material for: A Novel Rat Model of Type 2 Diabetes: The Zucker Fatty Diabetes Mellitus ZFDM Rat
Source: Hindawi journal article supplement (doi:10.1155/2013/103731), 2013-01-01
Supplement: f1 [file 103731.f1.pdf]

# Supplementary Figure 1

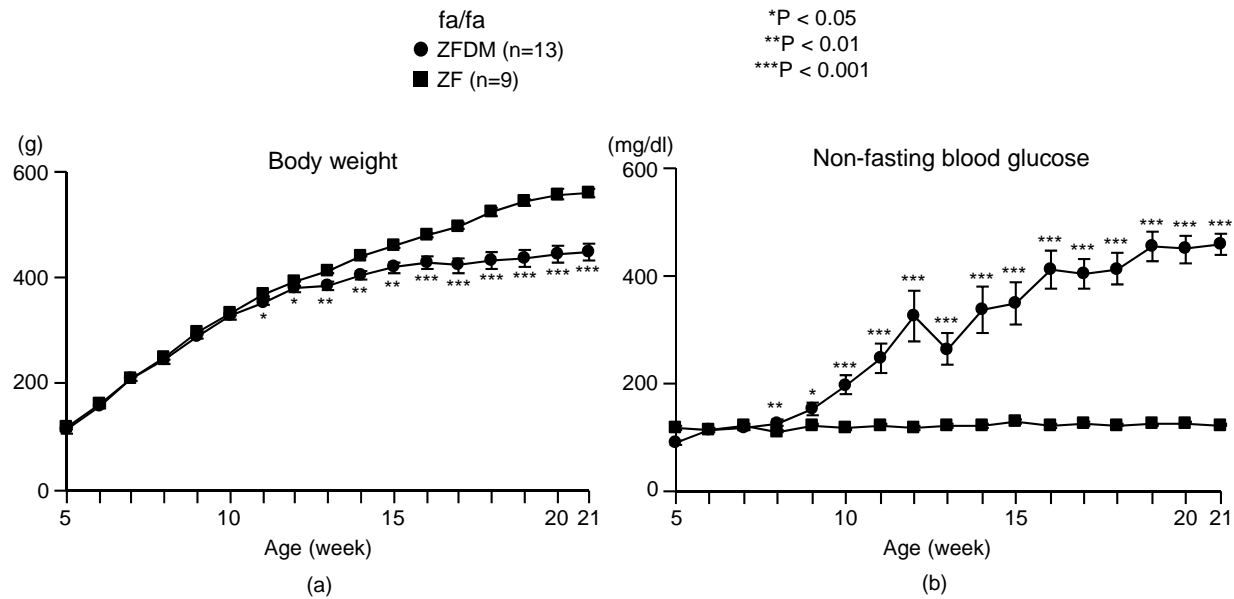

Supplementary figure 1:

Comparison of phenotypes between *fa/fa* rats in the ZFDM and ZF strains.

(a) body weight and (b) non-fasting blood glucose level of ZFDM (n=13) and ZF (n=9) male rats.

Welch's t test was used for comparisons between ZFDM and ZF strains.
